# Supplementary material for: PDGF-B Is Required for Development of the Glymphatic System
Source: PubMed Central journal article supplement — Cell Rep. Author manuscript; Available in PMC 2019 Apr 3. (PMC6447074; doi:10.1016/j.celrep.2019.02.050), 2019-03-12
Supplement: NIHMS1523852-supplement-1.pdf [file NIHMS1523852-supplement-1.pdf]

Cell Reports, Volume 26

## Supplemental Information

### **PDGF-B Is Required for Development of the Glymphatic System**

**Anne Sofie Munk, Wei Wang, Nicholas Burdon Bèchet, Ahmed M. Eltanahy, Anne Xiaoan Cheng, Björn Sigurdsson, Abdellatif Benraiss, Maarja A. Mäe, Benjamin Travis Kress, Douglas H. Kelley, Christer Betsholtz, Kjeld Møllgård, Anja Meissner, Maiken Nedergaard, and Iben Lundgaard**

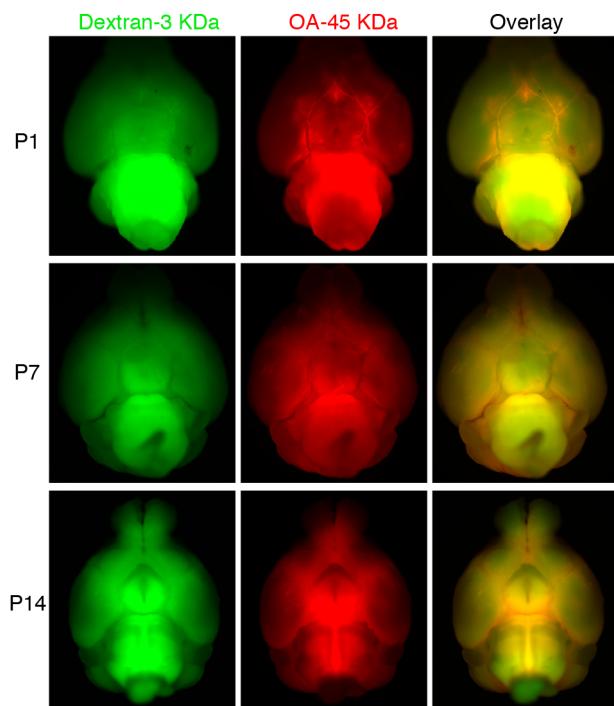

**Figure S1. Ventral view of tracer influx in P1, P7 and P14 mice, Related to Figure 1**

Dorsal view of whole brains showing distribution of CSF tracers FITC-dextran (dextran-3 kDa) and ovalbumin-Alexa647 (OA-45 kDa) 60 min after injection into the cisterna magna. P1 mouse brain (top panel) shows distribution of tracers around the Circle of Willis and along the proximal part of the middle cerebral artery (MCA). Images of dextran-3 kDa and OA-45kDa tracers in P7 (middle panel) and P14 brain (bottom panel) show tracer distribution around the Circle of Willis and the MCAs.

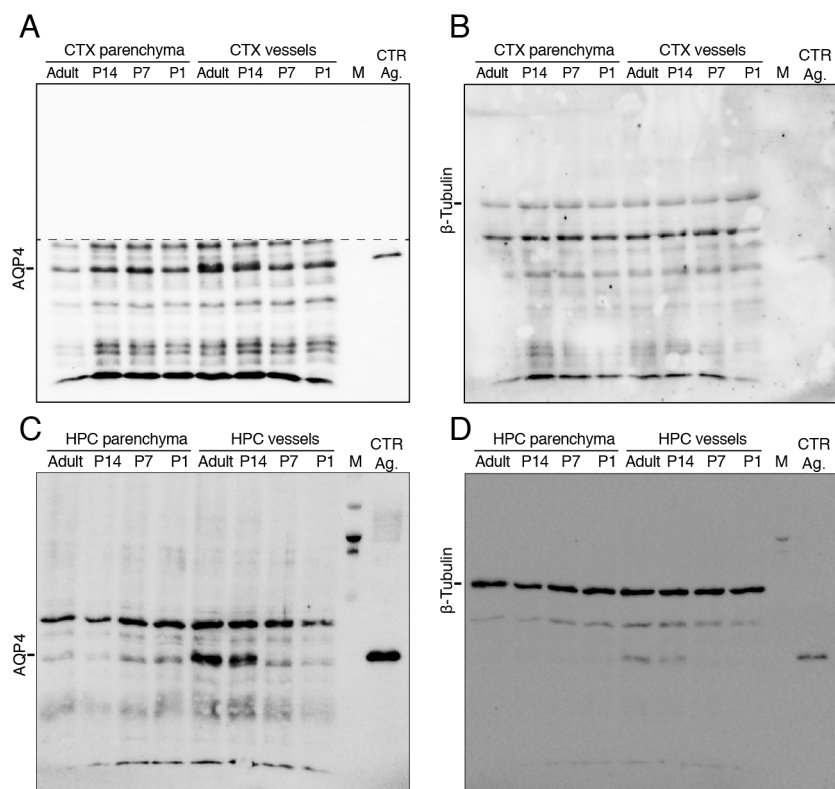

**Figure S2. Western blots of AQP4 vessel – and parenchymal fractions during development,**

**Related to Figure 3**

**A-D)** Representative Western blots of parenchyma fractions and isolated vessel fractions incubated with primary antibodies against aquaporin 4 (AQP4, 38 kDa); and  $\beta$ -tubulin (52 kDa).

**A)** The blot was covered starting from the dotted line and upwards to avoid strong signal from off-target bands. CTX, cortex; HPC, hippocampus; P, postnatal day; M, protein marker; CTR Ag., AQP4 control antigen.

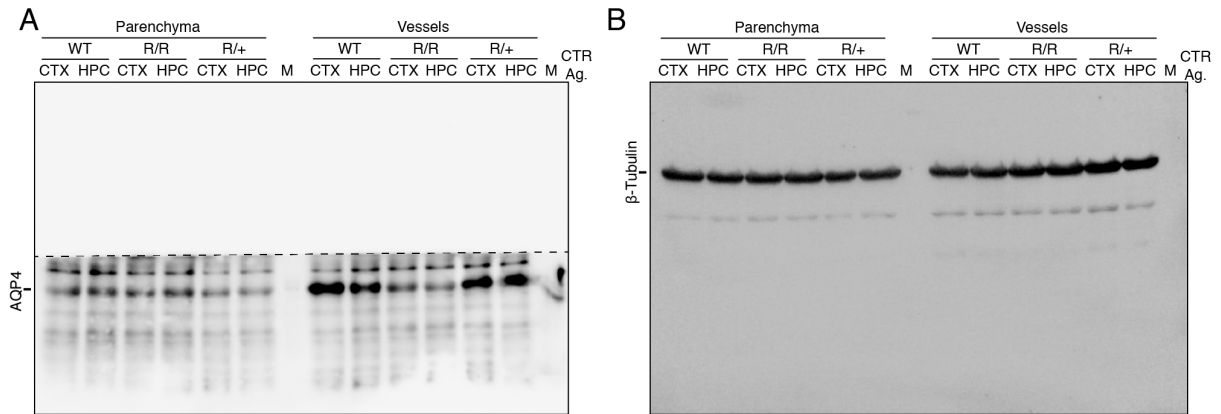

**Figure S3. Western blots of AQP4 vessel – and parenchymal fractions from *Pdgfb*<sup>ret/ret</sup>**

**mice, Related to Figure 6**

**A-B)** Representative Western blots of parenchyma fractions and isolated vessel fractions incubated with primary antibodies against aquaporin 4 (AQP4, 38 kDa); and  $\beta$ -tubulin (52 kDa).

**A)** The blot was covered starting from the dotted line and upwards to avoid strong signal from off-target bands. CTX, cortex; HPC, hippocampus; M, protein marker; CTR Ag., AQP4 control antigen; WT, wild type; R/R, *Pdgfb*<sup>ret/ret</sup>; R/+, *Pdgfb*<sup>ret/wt</sup>.
